# Supplementary material
Source: Research Square preprint supplement (doi:10.21203/rs.3.rs-9641440/v1)
Supplement: Supplementary file 1 [file 7222d932907c3925c45f1bf2.docx]

| IoT-Based Carbon Emissions Monitoring Systems | | | | | | |
| --- | --- | --- | --- | --- | --- | --- |
| Author(s) | **Year** | **Methodology** | **Context** | **Key Findings** | **Implication** | **DOI** |
| Fay, Corcoran, & Diamond | 2024 | Prototype design and event-detection testing on low-power microcontrollers | Sensor networks for carbon-emission event monitoring | Demonstrated resource-efficient real-time event detection for carbon-emission monitoring | Supports low-power IoT architectures for continuous emissions surveillance | 10.3390/s24010162 |
| Li, Pandey, & Pandey | 2025 | IoT tool development and implementation study | Anaerobic reactors / biogas systems | IoT improved real-time monitoring of GHG emissions in reactor environments | Useful for agricultural waste and bioenergy emissions monitoring | 10.3390/en18236191 |
| Bilotta et al. | 2022 | Traffic-sensor data modelling and reconstruction | Road traffic / transport emissions | IoT traffic-flow sensors can estimate CO₂ emissions under congested and uncongested conditions | Enables near-real-time transport carbon tracking for smart mobility systems | 10.3390/s22093382 |
| Kuncoro, Amaris, & Permana | 2022 | Hardware prototype and system evaluation | Indoor CO₂ monitoring | Developed a compact wireless CO₂ sensor node for strategic indoor monitoring | Supports affordable IoT CO₂ monitoring in enclosed environments | 10.3390/app122110784 |
| Zhu, Al-Ahmed, Shakir, & Olszewska | 2023 | IoT system development plus LSTM forecasting | Indoor air-quality monitoring | Combined low-cost IoT sensing with CO₂ steady-state forecasting | Strengthens predictive indoor carbon monitoring and ventilation support | 10.3390/electronics12010107 |
| Marquez-Zepeda et al. | 2025 | Low-cost system design plus LSTM evaluation | Indoor shared spaces | Scalable NDIR-based IoT platform predicted short- and long-term CO₂ concentrations | Valuable for proactive ventilation and smart-building carbon management | 10.3390/mca30020036 |
| Dadallage et al. | 2025 | Technical note; system development and field deployment | Precision dairy farming | Built a real-time IoT greenhouse-gas and weather monitoring system for dairy operations | Extends livestock emissions monitoring with integrated farm sensing | 10.3168/jdsc.2025-0862 |
| Gabriel et al. | 2024 | Large-scale deployment and user-intervention study | 84 homes with children | Real-time IoT feedback helped reduce indoor CO₂ levels and improve IAQ awareness | Shows household IoT monitoring can drive healthier behavioral change | 10.1016/j.buildenv.2024.112040 |
| Di Gilio et al. | 2021 | Pilot real-time surveillance study | Educational buildings / classrooms | Continuous CO₂ monitoring was effective as a strategic indicator for indoor risk control | Demonstrates operational value of CO₂ sensing in public buildings | 10.1016/j.envres.2021.111560 |
| Jaya et al. | 2025 | IoT monitoring system design and implementation | Paddy fields / agriculture | Developed an IoT system for methane-related GHG monitoring and soil-health tracking | Useful for climate-smart agriculture and emissions-aware farming | 10.18502/kls.v9i1.19350 |
| Li et al. | 2025 | BIM-IoT platform development and evaluation | Prefabricated building materialization | Platform improved real-time carbon tracking accuracy and source traceability | Important for construction-stage carbon accounting and control | 10.1016/j.resconrec.2025.108122 |
| D’Urso et al. | 2025 | In-field performance evaluation | Livestock buildings | IoT monitoring system effectively tracked particulate pollution in real conditions | Relevant for broader smart livestock emission and air-quality surveillance | 10.3390/s25164987 |
| Caraveo Mena et al. | 2025 | Distributed IoT system design and implementation | Vehicles using biofuels | Low-cost ESP32-based network monitored combustion gases across vehicles | Supports fleet-level emissions comparisons and cleaner transport monitoring | 10.3390/su17031153 |
| Rus et al. | 2025 | Comparative sensor evaluation | Educational facilities | KNX and IoT sensor data showed strong agreement for CO₂ monitoring when maintained properly | Validates smart-building monitoring infrastructure for school environments | 10.3389/fbuil.2025.1688582 |
| Kim et al. | 2023 | IoT sensing plus machine-learning estimation | Occupancy-aware ventilation management | CO₂ and pressure data enabled occupancy estimation from indoor sensing | Useful for demand-controlled ventilation and indirect carbon-control strategies | 10.3390/s23020585 |
| Zhao et al. | 2025 | One-year field monitoring and data-driven analysis | Office buildings | Long-term CO₂ and PM monitoring identified better sensor placement and sampling strategies | Improves efficiency and accuracy of office IoT monitoring deployments | 10.1016/j.buildenv.2025.113392 |
| Hassan et al. | 2025 | Experimental filtration plus IoT-based monitoring | Gasoline-engine emissions | Combined CO₂ removal with IoT-based emissions monitoring in engine exhaust applications | Suggests integrated mitigation-plus-monitoring approaches for mobile emissions | 10.3390/polym17111447 |
| Wu & Gao | 2021 | Multimodal regression using energy and air-quality data | Factories / industrial emissions | Model monitored factory emissions using multimodal data where direct measurement was unreliable | Useful for industrial proxy-based emissions surveillance | 10.3390/su13052663 |
| Arun et al. | 2024 | IoT sensing integrated with deep-learning energy modelling | Older buildings | IoT-enabled deep-learning monitoring improved energy-efficiency decision-making | Indirectly supports lower operational carbon emissions in aging buildings | 10.1016/j.csite.2024.104867 |
| Mota et al. | 2025 | IoT architecture implementation and case study | Indoor air quality during sleep periods | ESP32-C6, MQTT, and InfluxDB architecture enabled real-time CO₂ and PM monitoring | Provides a replicable low-cost architecture for continuous indoor monitoring | 10.3390/s25061683 |
| Sabando-Bravo, Navia, & Zambrano-Martinez | 2025 | Simulation plus physical implementation | Urban CO₂ monitoring network design | Evaluated alternative sensor-network layouts for city-level CO₂ monitoring | Helps optimize placement of urban carbon-monitoring nodes | 10.3390/jsan14050093 |
| Xiao, Ghafoorpoor Yazdi, & Thiede | 2025 | Prototype development and pilot-factory validation | Smart factory | Dynamic CO₂ map captured spatiotemporal distribution with low relative error | Strong for factory carbon visibility, safety, and HVAC optimization | 10.1016/j.procir.2025.02.191 |
| Christensen | 2025 | Literature review and use-case analysis | Industrial and environmental domains | Synthesized IIoT technologies for real-time CO₂ monitoring, measurement, and visualization | Useful framing study for industrial carbon-monitoring architectures | 10.1007/978-3-031-78572-6_3 |
| Xu et al. | 2022 | Conceptual framework and system proposal | Prefabricated buildings | Proposed a three-layer IoT-integrated embodied carbon assessment and monitoring system | Important early model for integrating sensing, communication, and carbon analysis | 10.1088/1755-1315/1101/2/022031 |
| Zhang et al. | 2021 | Platform architecture design | Small cities / urban carbon monitoring | Proposed an IoT-cloud smart carbon platform tailored for urban carbon monitoring | Foundational for city-scale digital carbon monitoring systems | 10.1007/s11276-021-02756-2 |

| Artificial Intelligence for Carbon Emission Prediction | | | | | | |
| --- | --- | --- | --- | --- | --- | --- |
| Author(s) | **Year** | **Methodology** | **Context** | **Key Findings** | **Implication** | **DOI** |
| Zhao, Kou, Wang, He, Xiong, Liu, & Cui | 2022 | Hybrid machine-learning prediction with QAP factor analysis | Yellow River Basin, China | ML outperformed simpler baseline approaches in forecasting regional carbon emissions and identifying major drivers | Useful for basin-level carbon governance and targeted regional mitigation | 10.3390/su14106153 |
| Kong, Song, & Yang | 2022 | Two-stage feature selection with optimized extreme learning machine | Daily carbon-emission forecasting | The optimized ELM model improved short-term daily carbon-emission prediction accuracy | Strong option for high-frequency carbon monitoring and operational forecasting | 10.1007/s11356-022-21277-9 |
| Franco, Melica, Treville, Baldi, Pisoni, Bertoldi, & Thiel | 2022 | Machine-learning forecasting framework | Cities and municipalities tracking climate targets | Proposed a city-level GHG forecasting approach using municipal indicators and showed usable predictive performance | Helps local governments monitor progress toward mitigation and adaptation commitments | 10.1016/j.scs.2022.104114 |
| Kumari & Singh | 2023 | Comparative time-series machine-learning models | India national CO₂ emissions | ML-based time-series models produced effective long-range CO₂ forecasts for India | Supports national carbon planning and scenario-based policy design | 10.1007/s11356-022-21723-8 |
| Yan, Zhang, Sun, & Wang | 2023 | Convolutional neural network | Early design-stage residential units in Beijing | CNN enabled real-time prediction of operational carbon emissions at residential-unit design stage | Useful for embedding low-carbon decisions earlier in building design workflows | 10.1016/j.jobe.2023.106994 |
| Han, Cui, Xu, Wang, & Guo | 2023 | Coupled LSTM-CNN deep learning model | 30 Chinese provinces | The hybrid CNN-LSTM improved provincial carbon-emission forecasting accuracy over single models | Supports subnational planning where temporal and spatial patterns interact | 10.3390/su151813934 |
| Xie, Huang, Tan, & Chen | 2024 | Comparative deep-learning study | China’s agricultural carbon emissions | Deep-learning models delivered strong performance for agricultural carbon-emission forecasting, with model differences by horizon and structure | Demonstrates AI value in agricultural decarbonization analysis | 10.1016/j.ecoinf.2024.102661 |
| Hu, Wang, Yang, & Yang | 2024 | Hybrid improved PSO-LSTM model | Building industry CO₂ emissions | The hybrid optimization–LSTM approach increased forecasting accuracy relative to conventional models | Useful for construction-sector carbon management and planning | 10.3390/en17174379 |
| Tu, Wang, Li, Wang, Hu, Luo, Shi, Li, Luo, & Yao | 2024 | RF-RFE-Deep Forest-Optuna framework | Coal-fired power plants | The optimized ensemble framework achieved accurate CO₂ prediction with improved feature selection and tuning | Valuable for plant-level emissions oversight and operational optimization | 10.3390/en17246449 |
| Ene Yalçın | 2024 | Comparative ML framework using MLR, RF, KNN, XGBoost, SVR, and MLP | Turkey sectoral GHG emissions | Advanced ML algorithms enabled sector-based GHG forecasting using multiple explanatory variables | Useful for economy-wide and sector-specific emissions planning | 10.3390/systems12120528 |
| Chen, Guo, Zhang, Wu, & Yang | 2024 | Explainable deep learning with multi-scale time-series modeling | Building carbon emissions | The model improved robustness and interpretability in building carbon-emission forecasts | Supports deployable building AI systems where explainability matters | 10.1016/j.enbuild.2024.114159 |
| Zheng, Luo, & Zhao | 2024 | Comparative machine-learning model development | Urban residential buildings in Guangzhou | ML methods provided a practical operational carbon-emission prediction model for residential buildings | Helps city-scale residential carbon management and smart-building control | 10.3390/buildings14113699 |
| Udoh, Ajuonu, Ajaegbu, et al. | 2024 | Supervised machine-learning modeling | Light-duty vehicle CO₂ emissions | ML models successfully predicted vehicle CO₂ emissions from vehicle-specification datasets | Useful for transport policy, vehicle benchmarking, and fleet emissions screening | 10.3390/s24248219 |
| Yang, Chen, Ke, He, Li, Liu, & Li | 2024 | Random forest with scenario analysis | Regional cities in Jiangsu Province, China | RF-based forecasts estimated city-level carbon-emission trends and peak timing under scenarios | Helpful for regional carbon-peak planning and differentiated city strategies | 10.3390/su162310450 |
| Jamei, Yaqoob, Farooque, Ali, Malik, Esau, & Hu | 2025 | Explainable predictive AI approach | Potato agriculture in Maritime Canada | AI models explained the main drivers of agricultural GHG emissions while forecasting emissions | Useful for climate-smart agriculture and interpretable farm-level mitigation decisions | 10.1016/j.atech.2024.100709 |
| Hamedani & Talebi | 2025 | Optimized artificial neural network with renewable-energy scenarios | Asia-wide CO₂ emissions | ANN-based long-term forecasting captured regional emissions trajectories and scenario effects | Valuable for continental-scale transition planning and scenario analysis | 10.1016/j.ecmx.2025.101030 |
| Begum & Mobin | 2025 | Machine-learning forecasting on multi-country dataset | Top eleven global emitters | The model projected future emissions trajectories and compared them with Paris-aligned prospects | Supports cross-country benchmarking and strategic climate-policy assessment | 10.1038/s41598-025-04236-5 |
| Ajala, Adeoye, Salami, et al. | 2025 | Comparative ML, deep-learning, and statistical modeling | Daily CO₂ emissions in China, India, USA, and EU27+UK | Comparing 14 models showed that AI models can improve daily emissions prediction relative to traditional approaches | Strong evidence for near-real-time policy dashboards and short-term emissions control | 10.1007/s11356-024-35764-8 |
| Adam, Yusuf, Amir, et al. | 2025 | Machine-learning prediction using demographic, economic, energy, and transport variables | Transportation-related GHG emissions in Africa’s top emitters | ML effectively forecast transport-sector GHG emissions using multi-factor national data | Useful for African transport decarbonization planning | 10.1186/s12302-025-01223-5 |
| Hong, Fu, & Dai | 2025 | Machine-learning prediction plus regional heterogeneity analysis | 30 Chinese provinces | The study combined carbon-emission prediction with province-specific reduction strategy design | Useful for customized provincial policy interventions rather than one-size-fits-all targets | 10.3390/su17051786 |
| Tian, Zhang, He, Yuan, Xie, Zhang, & Jing | 2025 | Machine-learning forecasting | Energy-based CO₂ emissions in the United States | ML provided actionable forecasts linking energy patterns to future U.S. CO₂ emissions | Supports national energy-transition planning and mitigation strategy design | 10.3390/su17072843 |
| Almsallti, Alzubi, & Adegboye | 2025 | Metaheuristic-optimized extreme learning machine | CO₂ prediction using globalization-related indicators | The hybrid ELM approach improved prediction performance using macro-level globalization drivers | Demonstrates the relevance of broader socioeconomic indicators in carbon forecasting | 10.3390/su17156783 |
| Chen, Chen, & Guo | 2025 | Extended STIRPAT with GA-BiLSTM | China provincial carbon peak prediction | Integrating STIRPAT with GA-BiLSTM improved provincial peak prediction and scenario sensitivity | Useful for estimating carbon-peak timing and designing province-level transition pathways | 10.3390/su17156819 |
| Zhang, Ma, Wang, Yang, & Wang | 2025 | Interpretable machine-learning framework with optimization | University campus CO₂ emissions | Interpretable ML predicted campus CO₂ emissions and identified optimization levers | Valuable for campus sustainability management and explainable decision support | 10.3390/su172310432 |
| Wang, Tan, Yu, Yu, Wang, & Zhou | 2025 | Deep hybrid framework integrating enhanced extreme learning machines | Building operational carbon emissions | The hybrid model delivered accurate operational carbon-emission forecasts for buildings | Useful for smart-building carbon control and operational decarbonization | 10.1016/j.egyr.2025.03.014 |

| Carbon Accounting and MRV Frameworks | | | | | | |
| --- | --- | --- | --- | --- | --- | --- |
| Author(s) | **Year** | **Methodology** | **Context** | **Key Findings** | **Implication** | **DOI** |
| Woo, Fatima, Kibert, Newman, Tian, & Srinivasan | 2021 | Systematic literature review | Building energy performance MRV and carbon credit markets | Showed blockchain can strengthen transparency, traceability, and trust in building energy MRV | Useful foundation for digital MRV in buildings and carbon-credit participation | 10.1016/j.buildenv.2021.108199 |
| Ong, Kasbun, Teh, Muhamad, & Javeed | 2021 | Survey-based empirical analysis | Malaysian companies | Found carbon accounting systems act as a bridge between carbon governance and carbon performance | Supports adoption of internal carbon accounting systems for better governance outcomes | 10.1080/20964129.2021.1927851 |
| Cordova, Zorio-Grima, & Merello | 2021 | Empirical governance analysis | Emerging economies | Corporate and contextual governance factors significantly affect carbon accounting and carbon performance | Highlights governance quality as a condition for effective carbon accounting | 10.1108/CG-10-2020-0473 |
| Luo & Tang | 2021 | Empirical corporate analysis | Firms’ carbon strategy and climate-risk awareness | Carbon strategy and climate-risk awareness strengthen the governance–carbon performance link | Suggests MRV and accounting systems work best when embedded in strategy | 10.1111/acfi.12687 |
| He, Luo, Shamsuddin, & Tang | 2022 | Literature review | Corporate carbon accounting research | Mapped the evolution of carbon accounting research from Kyoto to Paris and identified persistent methodological gaps | Strong review base for framing carbon accounting literature and gaps | 10.1111/acfi.12789 |
| Ong, Kasbun, Abdul Rahman, Meero, & Teh | 2022 | Mediation analysis | Malaysian firms | Carbon accounting significantly mediates the relationship between carbon risk management and carbon performance | Shows accounting systems are not just reporting tools but performance enablers | 10.32479/ijeep.12780 |
| Perosa, Newton, Gil, Piza, Sparovek, Rajão, Telles, & De Oliveira Silva | 2023 | Case study with interviews and document analysis | Low-carbon agriculture in Brazil | Developed a large-scale MRV perspective for low-carbon agriculture and identified operational bottlenecks across monitoring, reporting, and verification | Important for agricultural MRV system design in developing-country settings | 10.1016/j.envsci.2022.12.006 |
| Knapp, Stevenson, Renforth, Ascough, Knight, Bridgestock, Bickle, Lin, Riley, Mayes, & Tipper | 2023 | Multiproxy measurement framework | Enhanced rock weathering sites | Proposed a robust multiproxy method for quantifying CO₂ removal at field sites | Advances empirical MRV for carbon dioxide removal projects | 10.1021/acs.est.3c03757 |
| Reershemius, Kelland, Kantola, DeLucia, Silver, Paustian, & Beerling | 2023 | Proof-of-concept experimental method | Enhanced rock weathering in soils | Validated a soil-based mass-balance approach for empirical MRV of weathering rates | Offers a potentially scalable measurement protocol for ERW carbon credits | 10.1021/acs.est.3c03609 |
| Batjes, Ceschia, Heuvelink, Demenois, le Maire, Cardinael, Arias-Navarro, & van Egmond | 2024 | Framework development / review | Soil organic carbon stock-change assessment | Proposed a modular, multi-ecosystem MRV framework for SOC accounting | Useful for harmonizing soil-carbon MRV across ecosystems and project types | 10.1080/17583004.2024.2410812 |
| Li, Yang, Du, Liu, Zhang, Yang, Zhang, & Liu | 2024 | Review study | Electricity power industry | Reviewed direct and indirect electricity carbon accounting approaches and their shortcomings | Important reference for power-sector accounting method selection | 10.1016/j.apenergy.2024.122681 |
| Li, Fei, Du, Ong, & Arisian | 2024 | Framework development with applied modeling | Maritime transport | Proposed a near-real-time carbon accounting framework for tracking ship emissions at 15-minute intervals | Supports operational decarbonization and compliance in shipping | 10.1016/j.tre.2024.103724 |
| Luo, Shen, Liang, Sun, & Dong | 2024 | Blockchain tool development with case application | Solar PV systems in Hong Kong’s building sector | Developed a blockchain-based MRV tool for life-cycle PV carbon auditing | Strengthens traceability and verification of PV-related carbon accounting | 10.1016/j.jclepro.2024.143456 |
| Luo, Shen, Liang, Sun, & Dong | 2024 | Information-system design and case application | Building life-cycle carbon in Hong Kong | Built a traceable and immutable blockchain-enabled MRV system for embodied carbon | Useful for life-cycle carbon auditing in the built environment | 10.1016/j.resconrec.2024.107736 |
| Xu, Tao, Das, Kwok, Liu, Kuan, Lau, & Cheng | 2024 | Blockchain framework design and evaluation | Construction material and product certification | Proposed GPChain to support transparent carbon data sharing and certification | Relevant for supply-chain carbon certification and product-level traceability | 10.1016/j.aei.2023.102242 |
| Alotaibi, Khallaf, Abdallah, Zoubi, & Alnesafi | 2024 | Design science framework | Supply-chain ESG and carbon reporting | Developed a blockchain-driven framework integrating automated collection, verification, and analysis of emissions data | Useful for accountable supply-chain carbon reporting | 10.3390/su162410872 |
| Clarkson, Larkin, Swoboda, Reershemius, Suhrhoff, Maesano, & Campbell | 2024 | Review article | Enhanced weathering MRV in soils | Reviewed current measurement options for quantifying CDR via enhanced weathering | Helps researchers choose and combine MRV methods in EW projects | 10.3389/fclim.2024.1345224 |
| Wolf, Chang, Kantola, Blanc-Betes, Masters, Marklein, Moore, Bernacchi, & DeLucia | 2024 | Critical methodological validation | Enhanced rock weathering carbon removal calculation | Tested assumptions used in ERW carbon-removal estimation and exposed key uncertainties | Improves rigor in CDR accounting claims and protocol design | 10.1111/gcb.17031 |
| Li, Shi, Li, Xiao, Song, Zhang, Wang, Gu, Liu, & Lai | 2024 | System design with case studies | Real-time carbon neutrality management | Proposed a Modelx + MRV + O system using IoT and blockchain for real-time carbon neutralization | Extends MRV toward continuous, auditable carbon-neutrality operations | 10.1016/j.apenergy.2024.123763 |
| Körner, Leinauer, Ströher, & Strüker | 2025 | Conceptual and systems-oriented analysis | Voluntary carbon markets / decarbonization | Framed digital MRV as a key enabler for scalable and credible decarbonization markets | Important conceptual reference for digital MRV architecture | 10.1007/s12599-025-00953-3 |
| Thornbush & Govind | 2025 | Systematic review | Dryland nations in the Global South | Reviewed MRV protocol challenges and improvement pathways for carbon trading in drylands | Valuable for adapting MRV to underrepresented geographies | 10.3390/su172411001 |
| Yao & Zhang | 2025 | Perspective / gap analysis | Land-based carbon dioxide removal | Showed how life cycle assessment can strengthen MRV but also highlighted methodological gaps | Useful for integrating LCA consistently into CDR crediting protocols | 10.1021/acs.est.4c09510 |
| Merlo, Mendonça, Santos, Carvalho, Guerra, & Brandão | 2025 | Literature review | Blockchain in carbon markets | Synthesized blockchain applications for registries, transparency, and verification in carbon markets | Helps position blockchain as an MRV-support technology rather than a standalone solution | 10.1007/s44274-025-00260-4 |
| Traub, Morillas, Gil, Álvarez, & Martínez | 2025 | Index development and reporting assessment | Corporate emissions disclosure | Introduced the Carbon Integrity Index to assess transparency and completeness of corporate carbon reporting | Useful for evaluating reporting quality within carbon accounting systems | 10.3390/su17177628 |
| Brown & MacAskill | 2025 | Review and trajectory analysis | City-level carbon emissions accounting | Examined how cities use carbon data and what limits advanced urban carbon accounting practice | Important for municipal carbon accounting and data-governance frameworks | 10.1016/j.scs.2025.106677 |

| Integration of IoT, AI, and Carbon Accounting Systems | | | | | | |
| --- | --- | --- | --- | --- | --- | --- |
| Author(s) | **Year** | **Methodology** | **Context** | **Key Findings** | **Implication** | **DOI** |
| Woo, Fatima, Kibert, Newman, Tian, & Srinivasan | 2021 | Literature review | Building energy performance MRV and carbon credit markets | Blockchain can improve traceability, transparency, and trust in MRV workflows for building energy and carbon-credit systems | Foundational for digital MRV architectures that integrate monitored data with auditable carbon accounting | 10.1016/j.buildenv.2021.108199 |
| Xu, Tao, Das, Kwok, Liu, Kuan, Lau, & Cheng | 2024 | Framework development and case-oriented design | Construction material and product certification | Proposed a blockchain-based framework for carbon management and certification across construction materials/products | Supports verifiable product-level carbon accounting with interoperable digital records | 10.1016/j.aei.2023.102242 |
| Luo, Shen, Liang, Sun, & Dong | 2024 | System development and application case | Solar photovoltaic systems in Hong Kong buildings | Developed a solar-PV blockchain MRV tool for cleaner built-environment applications | Useful for tamper-resistant carbon accounting in distributed energy systems | 10.1016/j.jclepro.2024.143456 |
| Luo, Shen, Liang, Sun, & Dong | 2024 | Information-system design and application | Building life-cycle carbon auditing in Hong Kong | Built a traceable and immutable blockchain-enabled information management system for building life-cycle carbon MRV | Strengthens whole-life carbon accounting and regulatory reporting in buildings | 10.1016/j.resconrec.2024.107736 |
| Li, Shi, Li, Xiao, Song, Zhang, Wang, Gu, Liu, & Lai | 2024 | System design with applied modeling | Real-time carbon neutrality management | Proposed the **Modelx + MRV + O** system for real-time, credibility-oriented carbon neutrality management | Important example of integrating measurement, accounting, and operational decision support | 10.1016/j.apenergy.2024.123763 |
| Li, Jiang, Lin, Chen, Weng, & Jim | 2025 | Platform development and evaluation | Prefabricated building materialization | Developed an integrated **BIM-IoT** platform for real-time carbon-emission assessment and tracking | Shows how digital twins/BIM plus IoT can operationalize carbon accounting during construction execution | 10.1016/j.resconrec.2025.108122 |
| Aurangzeb & Yoon | 2025 | Proof-of-concept system | Sustainable construction processes | Proposed **AB-CELS**, integrating an AI-powered multimodal model with blockchain smart contracts to automate emissions ledger creation | Demonstrates AI-assisted parsing plus immutable carbon ledgers for auditable construction accounting | 10.1016/j.autcon.2025.106286 |
| Wu, Wang, He, & Chen | 2025 | Systematic review and framework proposal | Dynamic carbon monitoring in AEC | Reviewed real-time AEC carbon monitoring and proposed a framework combining sensors, BIM, RFID, and calculation layers | Useful for designing integrated monitoring-to-accounting systems in construction | 10.1016/j.seta.2025.104289 |
| Das | 2025 | Integrative review | Sustainable energy-efficient smart buildings | Reviewed how IoT and AI jointly support predictive maintenance, energy forecasting, climate control, and carbon reduction in smart buildings | Strong enabling reference for IoT-AI integration before formal carbon accounting layers are added | 10.3390/su172210313 |
| Xie, Li, Zaman, Song, & Wu | 2026 | Comprehensive review | GIS–AI-enhanced building LCA | Reviewed integration of GIS and AI within building life-cycle assessment and proposed a GIS–AI framework | Extends carbon accounting toward automated, spatially explicit, data-driven LCA systems | 10.1016/j.enbuild.2026.117095 |
| Pourrahmani, Talebi Amiri, Madi, & Owusu | 2025 | Review article | Carbon sequestration systems | Reviewed the joint use of IoT, AI, and blockchain for monitoring carbon fluxes, prediction, and transparent accounting/verification | One of the clearest direct integration studies across all three layers | 10.1016/j.egyr.2025.05.042 |
| Alotaibi, Khallaf, Abdallah, Zoubi, & Alnesafi | 2024 | Design-oriented framework study | Supply-chain ESG and carbon reporting | Developed a blockchain-driven framework for automated carbon accountability in supply chains | Relevant for extending IoT/AI-enabled enterprise data into trusted carbon reporting systems | 10.3390/su162410872 |
| Körner, Leinauer, Ströher, & Strüker | 2025 | Conceptual systems analysis | Digital MRV for decarbonization | Framed **digital MRV (dMRV)** as a scalable information-systems capability for decarbonization programs | Important theoretical anchor for integrating sensing, data exchange, verification, and reporting | 10.1007/s12599-025-00953-3 |
| Merlo, Mendonça, Santos, Carvalho, Guerra, & Brandão | 2025 | Literature review | Carbon markets | Reviewed blockchain applications in carbon markets, including verification, registries, and interoperability | Useful for positioning blockchain as an accounting and trust layer above emissions data systems | 10.1007/s44274-025-00260-4 |
| Boonrat, Wattanasoontorn, Ruktaengam, Boonmeeprakob, & Roswhan | 2025 | Pilot study using AI and big data | Tourism area carbon assessment in Phuket | Used AI object detection and electricity-use data to assess tourism-area carbon emissions | Demonstrates practical fusion of digital sensing/data streams with carbon estimation in urban services | 10.3390/engproc2025108023 |
| Li, Fei, Du, Ong, & Arisian | 2024 | Framework development | Maritime transport decarbonization | Proposed a near real-time carbon accounting framework for shipping operations | Strong sectoral example of operational data feeding near-real-time carbon accounting | 10.1016/j.tre.2024.103724 |
| Li, Yang, Du, Liu, Zhang, Yang, Zhang, & Liu | 2024 | Review study | Electricity power industry | Reviewed direct and indirect carbon accounting approaches for the electricity industry | Important accounting-method reference for integrating digital power data with carbon models | 10.1016/j.apenergy.2024.122681 |
| Brown & MacAskill | 2025 | Analytical review | City carbon accounting and management | Examined trajectories toward advanced urban carbon-data use | Useful for situating integrated digital carbon systems at city scale | 10.1016/j.scs.2025.106677 |
| Pittri, Aklashie, Godawatte, Sackey, Agyekum, & Ghansah | 2025 | Systematic review | Construction industry | Reviewed how IoT supports carbon-emission management in construction | Good source on the sensing layer that feeds integrated construction carbon systems | 10.3390/iic1030008 |
| Cespedes-Cubides & Jradi | 2024 | Review article | Building operational stage | Reviewed digital twins for improving building energy efficiency | Supports the digital-twin layer that can combine IoT streams, AI analytics, and carbon indicators | 10.1186/s42162-024-00313-7 |
| Arsecularatne, Rodrigo, & Chang | 2024 | Review article | Building energy and digital twins | Synthesized how digital twins help reduce energy consumption in buildings | Relevant enabling study for carbon-aware building operation through digital replicas | 10.3390/su16219275 |
| Sandaruwan, Illankoon, & Yiu | 2025 | Review article | Embodied-carbon tracking in buildings | Reviewed technology-based embodied-carbon tracking and monitoring systems | Directly relevant to integration of digital technologies with embodied carbon accounting | 10.3390/buildings15244421 |
| Zhao, Li, Shen, Teng, Wu, & Liu | 2025 | Review article | Construction industry carbon management | Reviewed current status and emerging trends in managing construction carbon emissions | Strong synthesis of the wider ecosystem into which IoT/AI/accounting integration fits | 10.1016/j.rser.2024.115237 |
| Yang, Tang, Zhang, Zhang, & Doan | 2024 | Review article | Construction digital twins | Reviewed digital twin architecture, applications, trends, and challenges in construction | Supports integration pathways between physical sensing, analytics, and sustainability assessment | 10.3390/buildings14092616 |
| Zhao, Wu, Yu, Wang, & Huang | 2025 | Review article | Construction carbon accounting | Reviewed accounting scales, boundaries, trends, and gaps in construction carbon emissions | Useful for linking digital monitoring systems to appropriate accounting boundaries and scales | 10.3390/buildings15111900 |
